# Supplementary material
Source: publisher figshare collection journal article supplement (https://tandf.figshare.com/articles/dataset/_/19831250)
Supplement: Supplementary file 2 [file 2]

# Appendix for “Enforcing stationarity through the prior in vector autoregressions”

Sarah E. Heaps

Department of Mathematical Sciences, Durham University

May 13, 2022

## Appendix

### Forward mapping: VAR parameters to partial autocorrelations

This proceeds as described in Ansley and Newbold (1979). Using Cholesky factors in the matrix-square-roots below leads to the parameterization of Ansley and Kohn (1986), whilst using symmetric matrix-square-roots gives rise to the parameterization described in this paper.

The mapping from  $(\Sigma, \Phi) \in \mathcal{S}_m^+ \times \mathcal{C}_{p,m}$  to  $\{\Sigma, (P_1, \dots, P_p)\} \in \mathcal{S}_m^+ \times \mathcal{V}_m^p$ , described in Ansley and Newbold (1979), proceeds in two main stages.

1. From  $(\Sigma, \Phi)$ , compute the autocovariances  $\Gamma_i = \text{Cov}(\mathbf{y}_t, \mathbf{y}_{t+i})$  ( $i = 0, \dots, p$ ).  $\Gamma_0, \dots, \Gamma_{p-1}$  can be found by representing the autoregression as a  $\text{VAR}_{pm}(1)$  process and computing its stationary variance. The resulting discrete Lyapunov equation can be solved using vectorization and Kronecker product operators. The remaining autocovariance  $\Gamma_p$  can then be calculated using the Yule-Walker equations for the order  $p$  process. For further details, see, for example, Chapter 2 of Lütkepohl (2005).
2. From  $\Phi$  and  $(\Gamma_0, \dots, \Gamma_p)$  compute  $(P_1, \dots, P_p)$ :
  - (a) Initialize: construct  $\Sigma_0 = \Sigma_0^* = \Gamma_0$  and then calculate the matrix-square-root factorizations,  $\Sigma_0 = \Sigma_0^* = S_0 S_0^T = S_0^* S_0^{*T}$ .
  - (b) Recursion: for  $s = 0, \dots, p-1$ :
    - (i) Compute  $\phi_{s+1,s+1}$  and  $\phi_{s+1,s+1}^*$  using

$$\begin{aligned}\phi_{s+1,s+1} &= (\Gamma_{s+1}^T - \phi_{s1}\Gamma_s^T - \dots - \phi_{ss}\Gamma_1^T) \Sigma_s^{*-1}, \\ \phi_{s+1,s+1}^* &= (\Gamma_{s+1} - \phi_{s1}^*\Gamma_s - \dots - \phi_{ss}^*\Gamma_1) \Sigma_s^{-1},\end{aligned}$$

where it is understood that when  $s = 0$ , these expressions simplify to  $\phi_{11} = \Gamma_1^T \Sigma_0^{*-1} = \Gamma_1^T \Gamma_0^{-1}$ ,  $\phi_{11}^* = \Gamma_1 \Gamma_0^{-1}$ .

- (ii) If  $s > 0$ , for  $i = 1, \dots, s$ , compute  $\phi_{s+1,i}$  and  $\phi_{s+1,i}^*$  using

$$\phi_{s+1,i} = \phi_{si} - \phi_{s+1,s+1}\phi_{s,s-i+1}^*, \quad \phi_{s+1,i}^* = \phi_{si}^* - \phi_{s+1,s+1}^*\phi_{s,s-i+1}.$$

(iii) Compute  $P_{s+1}$  using one of

$$P_{s+1} = S_s^{-1} \phi_{s+1,s+1} S_s^*, \quad P_{s+1} = (S_s^{*-1} \phi_{s+1,s+1}^* S_s)^T.$$

(iv) If  $s < p-1$ , compute  $\Sigma_{s+1}$  and  $\Sigma_{s+1}^*$  using

$$\begin{aligned} \Sigma_{s+1} &= \Gamma_0 - \phi_{s+1,1} \Gamma_1 - \cdots - \phi_{s+1,s+1} \Gamma_{s+1}, \\ \Sigma_{s+1}^* &= \Gamma_0 - \phi_{s+1,1}^* \Gamma_1^T - \cdots - \phi_{s+1,s+1}^* \Gamma_{s+1}^T, \end{aligned}$$

then calculate the matrix-square-roots,  $\Sigma_{s+1} = S_{s+1} S_{s+1}^T$ ,  $\Sigma_{s+1}^* = S_{s+1}^* S_{s+1}^{*T}$ .

## Reverse mapping: partial autocorrelations to VAR parameters

The inverse mapping from  $\{\Sigma, (P_1, \dots, P_p)\} \in \mathcal{S}_m^+ \times \mathcal{V}_m^p$  to  $(\Sigma, \Phi) \in \mathcal{S}_m^+ \times \mathcal{C}_{p,m}$ , comprises two recursions; the first is new and the second is based on Lemma 2.1 of Ansley and Kohn (1986).

1. From  $\{\Sigma, (P_1, \dots, P_p)\}$  compute the stationary variance matrix  $\Gamma_0$ :

- (a) Initialize: let  $\Sigma_p = \Sigma$  with corresponding matrix-square-root factorization,  $\Sigma_p = S_p S_p^T$ .
- (b) Recursion: for  $s = p-1, \dots, 0$  construct the symmetric (or lower triangular) matrix  $S_s$  such that

$$\Sigma_{s+1} = S_s (I_m - P_{s+1} P_{s+1}^T) S_s^T,$$

then compute  $\Sigma_s = S_s S_s^T$ .

- (c) Output: take  $\Gamma_0 = \Sigma_0$ .

2. From  $(P_1, \dots, P_p)$  and  $\Gamma_0$  compute the matrices in  $\Phi$ :

- (a) Initialize: let  $\Sigma_0 = \Sigma_0^* = \Gamma_0$  with corresponding matrix-square-root factorization,  $\Sigma_0 = \Sigma_0^* = S_0 S_0^T = S_0^* S_0^{*T}$ .
- (b) Recursion: for  $s = 0, \dots, p-1$ :
  - (i) Compute  $\phi_{s+1,s+1}$  and  $\phi_{s+1,s+1}^*$  using

$$\phi_{s+1,s+1} = S_s P_{s+1} S_s^{*-1}, \quad \phi_{s+1,s+1}^* = S_s^* P_{s+1}^T S_s^{-1}.$$

- (ii) If  $s > 0$ , for  $i = 1, \dots, s$ , compute  $\phi_{s+1,i}$  and  $\phi_{s+1,i}^*$  using

$$\phi_{s+1,i} = \phi_{si} - \phi_{s+1,s+1} \phi_{s,s-i+1}^*, \quad \phi_{s+1,i}^* = \phi_{si}^* - \phi_{s+1,s+1}^* \phi_{s,s-i+1}.$$

- (iii) Compute  $\Sigma_{s+1}$  and  $\Sigma_{s+1}^*$  using

$$\Sigma_{s+1} = \Sigma_s - \phi_{s+1,s+1} \Sigma_s^* \phi_{s+1,s+1}^T, \quad \Sigma_{s+1}^* = \Sigma_s^* - \phi_{s+1,s+1}^* \Sigma_s \phi_{s+1,s+1}^T,$$

then calculate the matrix-square-roots,  $\Sigma_{s+1} = S_{s+1} S_{s+1}^T$  and  $\Sigma_{s+1}^* = S_{s+1}^* S_{s+1}^{*T}$ .

- (iv) Compute  $\Gamma_{s+1}$  using

$$\Gamma_{s+1}^T = \phi_{s+1,s+1} \Sigma_s^* + \phi_{s1} \Gamma_s^T + \cdots + \phi_{ss} \Gamma_1^T.$$

- (c) Output: take  $\phi_i = \phi_{pi}$  ( $i = 1, \dots, p$ ). By construction,  $\Sigma = \Sigma_p$ .
